# Supplementary material for: Lowering Low-Density Lipoprotein Particles in Plasma Using Dextran Sulphate Co-Precipitates Procoagulant Extracellular Vesicles
Source: PubMed Central journal article supplement (PMC5796044; doi:10.3390/ijms19010094), 2017-12-29
Supplement: ijms-19-00094-s001.pdf [file ijms-19-00094-s001.pdf]

***Supplemental Table 1 Proteins only present in VLDL fraction***

|    | Entrez Gene Name                                                | Coagulation System | Extrinsic Prothrombin Activation | Intrinsic Prothrombin Activation | Cellular location |
|----|-----------------------------------------------------------------|--------------------|----------------------------------|----------------------------------|-------------------|
| 1  | ADP-ribosylation factor interacting protein 1                   | -                  | -                                | -                                | Cytoplasm         |
| 2  | afamin                                                          | -                  | -                                | -                                | Extracellular     |
| 3  | alpha-1-B glycoprotein                                          | -                  | -                                | -                                | Extracellular     |
| 4  | alpha-2-macroglobulin                                           | +                  | -                                | -                                | Extracellular     |
| 5  | alpha-2-macroglobulin-like 1                                    | -                  | -                                | -                                | Cytoplasm         |
| 6  | angiotensinogen (serpin peptidase inhibitor, clade A, member 8) | -                  | -                                | -                                | Extracellular     |
| 7  | angiotensinogen (serpin peptidase inhibitor, clade A, member 8) | -                  | -                                | -                                | Extracellular     |
| 8  | apolipoprotein B                                                | -                  | -                                | -                                | Extracellular     |
| 9  | apolipoprotein B                                                | -                  | -                                | -                                | Extracellular     |
| 10 | apolipoprotein E                                                | -                  | -                                | -                                | Extracellular     |
| 11 | apolipoprotein E                                                | -                  | -                                | -                                | Extracellular     |
| 12 | apolipoprotein E                                                | -                  | -                                | -                                | Extracellular     |
| 13 | ArfGAP with GTPase domain, ankyrin repeat and PH domain 6       | -                  | -                                | -                                | Other             |
| 14 | ATP-binding cassette, sub-family A (ABC1), member 1             | -                  | -                                | -                                | Plasma Membrane   |
| 15 | ATP-binding cassette, sub-family C (CFTR/MRP), member 12        | -                  | -                                | -                                | Cytoplasm         |
| 16 | attractin                                                       | -                  | -                                | -                                | Extracellular     |
| 17 | Bardet-Biedl syndrome 4                                         | -                  | -                                | -                                | Cytoplasm         |
| 18 | carboxypeptidase N, polypeptide 2                               | -                  | -                                | -                                | Extracellular     |
| 19 | caspase 8, apoptosis-related cysteine peptidase                 | -                  | -                                | -                                | Nucleus           |
| 20 | Cbl proto-oncogene, E3 ubiquitin protein ligase                 | -                  | -                                | -                                | Nucleus           |
| 21 | ceruloplasmin (ferroxidase)                                     | -                  | -                                | -                                | Extracellular     |
| 22 | chemokine (C-X-C motif) ligand 2                                | -                  | -                                | -                                | Extracellular     |
| 23 | cholinergic receptor, muscarinic 2                              | -                  | -                                | -                                | Plasma Membrane   |

|    |                                                                  |   |   |   |                    |
|----|------------------------------------------------------------------|---|---|---|--------------------|
| 24 | chromosome 6 open reading frame 163                              | - | - | - | Membrane<br>Other  |
| 25 | clathrin, heavy chain (Hc)                                       | - | - | - | Plasma<br>Membrane |
| 26 | coagulation factor V (proaccelerin, labile factor)               | + | + | + | Plasma<br>Membrane |
| 27 | coagulation factor XII (Hageman factor)                          | + | + | + | Extracellular      |
| 28 | coagulation factor XIII, A1 polypeptide                          | + | + | + | Extracellular      |
| 29 | coagulation factor XIII, B polypeptide                           | + | + | + | Extracellular      |
| 30 | collagen, type IV, alpha 3 (Goodpasture antigen) binding protein | - | - | - | Cytoplasm          |
| 31 | collagen, type IX, alpha 3                                       | - | - | - | Extracellular      |
| 32 | complement component 2                                           | - | - | - | Extracellular      |
| 33 | complement component 3                                           | - | - | - | Extracellular      |
| 34 | complement component 8, alpha polypeptide                        | - | - | - | Extracellular      |
| 35 | complement factor B                                              | - | - | - | Extracellular      |
| 36 | cornulin                                                         | - | - | - | Cytoplasm          |
| 37 | cyclin and CBS domain divalent metal cation transport mediator 2 | - | - | - | Plasma<br>Membrane |
| 38 | diaphanous-related formin 2                                      | - | - | - | Cytoplasm          |
| 39 | dimethylarginine dimethylaminohydrolase 1                        | - | - | - | Cytoplasm          |
| 40 | endoglin                                                         | - | - | - | Plasma<br>Membrane |
| 41 | envoplakin                                                       | - | - | - | Plasma<br>Membrane |
| 42 | EPS8-like 2                                                      | - | - | - | Other              |
| 43 | exocyst complex component 5                                      | - | - | - | Cytoplasm          |
| 44 | extracellular matrix protein 1                                   | - | - | - | Extracellular      |
| 45 | family with sequence similarity 186, member A                    | - | - | - | Other              |
| 46 | F-box and leucine-rich repeat protein 19                         | - | - | - | Other              |
| 47 | fibrinogen alpha chain                                           | + | + | + | Extracellular      |

|    |                                                                                           |   |   |   |                    |
|----|-------------------------------------------------------------------------------------------|---|---|---|--------------------|
| 48 | fibronectin 1                                                                             | - | - | - | Extracellular      |
| 49 | ficolin (collagen/fibrinogen domain containing) 3                                         | - | - | - | Extracellular      |
| 50 | flightless I homolog (Drosophila)                                                         | - | - | - | Nucleus            |
| 51 | flightless I homolog (Drosophila)                                                         | - | - | - | Nucleus            |
| 52 | gelsolin                                                                                  | - | - | - | Extracellular      |
| 53 | growth factor receptor-bound protein 2                                                    | - | - | - | Cytoplasm          |
| 54 | histone cluster 1, H1b                                                                    | - | - | - | Nucleus            |
| 55 | hyaluronan binding protein 2                                                              | - | - | - | Extracellular      |
| 56 | immunoglobulin heavy constant gamma 1 (G1m marker)                                        | - | - | - | Extracellular      |
| 57 | immunoglobulin heavy constant gamma 1 (G1m marker)                                        | - | - | - | Extracellular      |
| 58 | immunoglobulin heavy constant gamma 1 (G1m marker)                                        | - | - | - | Extracellular      |
| 59 | immunoglobulin heavy constant mu                                                          | - | - | - | Plasma<br>Membrane |
| 60 | immunoglobulin heavy locus                                                                | - | - | - | Other              |
| 61 | immunoglobulin J polypeptide, linker protein for immunoglobulin alpha and mu polypeptides | - | - | - | Extracellular      |
| 62 | immunoglobulin kappa constant                                                             | - | - | - | Extracellular      |
| 63 | immunoglobulin kappa variable 3-20                                                        | - | - | - | Extracellular      |
| 64 | immunoglobulin lambda constant 1 (Mcg marker)                                             | - | - | - | Cytoplasm          |
| 65 | immunoglobulin lambda constant 1 (Mcg marker)                                             | - | - | - | Cytoplasm          |
| 66 | immunoglobulin lambda constant 1 (Mcg marker)                                             | - | - | - | Cytoplasm          |
| 67 | insulin receptor                                                                          | - | - | - | Plasma<br>Membrane |
| 68 | insulin-like growth factor binding protein, acid labile subunit                           | - | - | - | Extracellular      |
| 69 | inter-alpha-trypsin inhibitor heavy chain 1                                               | - | - | - | Extracellular      |
| 70 | inter-alpha-trypsin inhibitor heavy chain 3                                               | - | - | - | Extracellular      |
| 71 | IQ motif containing E                                                                     | - | - | - | Cytoplasm          |
| 72 | junction plakoglobin                                                                      | - | - | - | Plasma<br>Membrane |
| 73 | keratin 1                                                                                 | - | - | - | Cytoplasm          |

|     |                                                 |   |   |   |                    |
|-----|-------------------------------------------------|---|---|---|--------------------|
| 74  | keratin 10                                      | - | - | - | Cytoplasm          |
| 75  | keratin 15                                      | - | - | - | Cytoplasm          |
| 76  | keratin 18                                      | - | - | - | Cytoplasm          |
| 77  | keratin 19                                      | - | - | - | Cytoplasm          |
| 78  | keratin 2                                       | - | - | - | Other              |
| 79  | keratin 24                                      | - | - | - | Cytoplasm          |
| 80  | keratin 25                                      | - | - | - | Other              |
| 81  | keratin 27                                      | - | - | - | Other              |
| 82  | keratin 35                                      | - | - | - | Cytoplasm          |
| 83  | keratin 38                                      | - | - | - | Cytoplasm          |
| 84  | keratin 6B                                      | - | - | - | Cytoplasm          |
| 85  | keratin 76                                      | - | - | - | Cytoplasm          |
| 86  | keratin 77                                      | - | - | - | Cytoplasm          |
| 87  | keratin 9                                       | - | - | - | Other              |
| 88  | kinesin family member 1B                        | - | - | - | Cytoplasm          |
| 89  | kinesin family member 20B                       | - | - | - | Nucleus            |
| 90  | kinesin family member 3C                        | - | - | - | Cytoplasm          |
| 91  | Kirsten rat sarcoma viral oncogene homolog      | - | - | - | Cytoplasm          |
| 92  | leucine rich repeat containing 48               | - | - | - | Cytoplasm          |
| 93  | lipoprotein, Lp(a)                              | - | - | - | Extracellular      |
| 94  | microcephalin 1                                 | - | - | - | Nucleus            |
| 95  | minichromosome maintenance complex component 10 | - | - | - | Nucleus            |
| 96  | MIR7-3 host gene (non-protein coding)           | - | - | - | Other              |
| 97  | mitotic spindle organizing protein 2B           | - | - | - | Cytoplasm          |
| 98  | multiple PDZ domain protein                     | - | - | - | Plasma<br>Membrane |
| 99  | myelin expression factor 2                      | - | - | - | Nucleus            |
| 100 | myosin VA (heavy chain 12, myosin)              | - | - | - | Cytoplasm          |
| 101 | NEDD4 binding protein 2                         | - | - | - | Cytoplasm          |
| 102 | nicotinate phosphoribosyltransferase            | - | - | - | Cytoplasm          |

|     |                                                                                                        |   |   |   |                    |
|-----|--------------------------------------------------------------------------------------------------------|---|---|---|--------------------|
| 103 | nipsnap homolog 1 (C. elegans)                                                                         | - | - | - | Cytoplasm          |
| 104 | olfactomedin 3                                                                                         | - | - | - | Cytoplasm          |
| 105 | phosphoglycerate kinase 2                                                                              | - | - | - | Cytoplasm          |
| 106 | phospholipase D family, member 5                                                                       | - | - | - | Other              |
| 107 | phospholipase D family, member 5                                                                       | - | - | - | Other              |
| 108 | phosphoprotein membrane anchor with glycosphingolipid microdomains 1                                   | - | - | - | Plasma<br>Membrane |
| 109 | phosphorylase kinase, beta                                                                             | - | - | - | Cytoplasm          |
| 110 | protein tyrosine phosphatase, receptor type, G                                                         | - | - | - | Plasma<br>Membrane |
| 111 | protocadherin gamma subfamily C, 5                                                                     | - | - | - | Cytoplasm          |
| 112 | Ras association (RalGDS/AF-6) domain family member 6                                                   | - | - | - | Other              |
| 113 | RB1-inducible coiled-coil 1                                                                            | - | - | - | Nucleus            |
| 114 | regulator of G-protein signaling 7                                                                     | - | - | - | Cytoplasm          |
| 115 | Rho GTPase activating protein 36                                                                       | - | - | - | Cytoplasm          |
| 116 | ribosomal protein L32                                                                                  | - | - | - | Cytoplasm          |
| 117 | serpin peptidase inhibitor, clade A (alpha-1 antiproteinase, antitrypsin), member 7                    | - | - | - | Extracellular      |
| 118 | serpin peptidase inhibitor, clade F (alpha-2 antiplasmin, pigment epithelium derived factor), member 2 | + | - | - | Extracellular      |
| 119 | SH2B adaptor protein 3                                                                                 | - | - | - | Plasma<br>Membrane |
| 120 | SH3 and multiple ankyrin repeat domains 2                                                              | - | - | - | Plasma<br>Membrane |
| 121 | SHC SH2-domain binding protein 1-like                                                                  | - | - | - | Other              |
| 122 | Sp4 transcription factor                                                                               | - | - | - | Nucleus            |
| 123 | spectrin repeat containing, nuclear envelope 1                                                         | - | - | - | Nucleus            |
| 124 | spectrin repeat containing, nuclear envelope 2                                                         | - | - | - | Nucleus            |
| 125 | spectrin repeat containing, nuclear envelope 2                                                         | - | - | - | Nucleus            |
| 126 | sphingosine-1-phosphate phosphatase 2                                                                  | - | - | - | Cytoplasm          |

|     |                                                                                  |   |   |   |               |
|-----|----------------------------------------------------------------------------------|---|---|---|---------------|
| 127 | ST3 beta-galactoside alpha-2,3-sialyltransferase 6                               | - | - | - | Cytoplasm     |
| 128 | sterile alpha motif domain containing 11                                         | - | - | - | Nucleus       |
| 129 | synovial sarcoma, X breakpoint 5                                                 | - | - | - | Other         |
| 130 | TAF15 RNA polymerase II, TATA box binding protein (TBP)-associated factor, 68kDa | - | - | - | Nucleus       |
| 131 | TATA box binding protein (TBP)-associated factor, RNA polymerase I, A            | - | - | - | Nucleus       |
| 132 | tetratricopeptide repeat domain 16                                               | - | - | - | Other         |
| 133 | thyroid hormone receptor interactor 12                                           | - | - | - | Cytoplasm     |
| 134 | thyroid hormone receptor interactor 6                                            | - | - | - | Extracellular |
| 135 | titin                                                                            | - | - | - | Cytoplasm     |
| 136 | transmembrane phosphoinositide 3-phosphatase and tensin homolog 2 pseudogene 1   | - | - | - | Other         |
| 137 | transmembrane protein 131                                                        | - | - | - | Extracellular |
| 138 | tudor domain containing 15                                                       | - | - | - | Other         |
| 139 | ubiquitously transcribed tetratricopeptide repeat containing, Y-linked           | - | - | - | Other         |
| 140 | ubiquitously transcribed tetratricopeptide repeat containing, Y-linked           | - | - | - | Other         |
| 141 | uroporphyrinogen decarboxylase                                                   | - | - | - | Cytoplasm     |
| 142 | v-myb avian myeloblastosis viral oncogene homolog                                | - | - | - | Nucleus       |
| 143 | von Willebrand factor                                                            | + | - | - | Extracellular |
| 144 | zinc finger protein 227                                                          | - | - | - | Nucleus       |

---

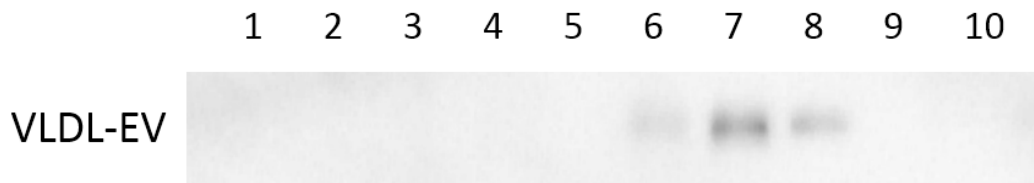

**Supplemental Figure S1. Distribution of CD9 in (V)LDL sub-fractions after density gradient centrifugation.**

Numbers on top stand for the sub-fractions after density gradient experiments. The sub-fractions were the same ones as in Figure 3. The sub-fractions after density gradient experiment were pooled respectively from 20 healthy donors and lysed with 0.1% Sodium dodecyl sulfate (SDS) for Western Blot. Western Blot was performed on the 4-12% gradient Bis-Trisgel (NuPage, Invitrogen). The antibodies used in Western Blot for CD9: CD9 Antibody (C-4) (santa cruz biotechnology#SC13118, primary antibody), Polyclonal Goat Anti-Mouse Immunoglobulins (Dako# P0447, secondary antibody). For visualization, the ECL kit HRP (Substrate), Immobilon Western Chemiluminescent HRP substrate (Milipore #WBKLS0500), was used.
